# Supplementary material for: CSF α-synuclein seed amplification kinetic profiles are associated with cognitive decline in Parkinson’s disease
Source: PubMed Central journal article supplement (PMC10799016; doi:10.1038/s41531-023-00627-5), 2024-01-20
Supplement: 41531_2023_627_MOESM1_ESM.pdf [file 41531_2023_627_MOESM1_ESM.pdf]

**Supplementary Tables 1: Demographic, clinical and CSF characteristics stratified by number of positive seeding replicates for PD-wildtype and PD-GBA separately**

| <b>Number of positive seeding replicates out of 4 (PD-Wildtype)</b> | <b>2</b>   | <b>3</b>  | <b>4</b>       | <b>p-value</b> |
|---------------------------------------------------------------------|------------|-----------|----------------|----------------|
| Male sex %                                                          | 100        | 52        | 77             | 0.002          |
| Age, years                                                          | 59 ± 8     | 62 ± 8    | 68 ± 8 ***     | ≤0.001         |
| Age at onset, years                                                 | 55 ± 7     | 58 ± 8    | 62 ± 8 *       | 0.004          |
| Disease duration, years                                             | 4 ± 3      | 4 ± 3     | 5 ± 3          | 0.145          |
| H&Y                                                                 | 2.0 ± 0.3  | 2.0 ± 0.5 | 2.0 ± 0.6      | 0.407          |
| H&Y ≥2.5 %                                                          | 14         | 3         | 9              | 0.409          |
| UPDRS-III                                                           | 22 ± 6     | 21 ± 10   | 26 ± 10        | 0.135          |
| Montreal Cognitive Assessment                                       | 27 ± 2     | 27 ± 4    | 25 ± 4 *       | 0.031          |
| Cognitive impairment                                                |            |           |                |                |
| - At baseline %                                                     | 23         | 17        | 36             | 0.158          |
| - New during study %                                                | 20         | 28        | 19             | 0.718          |
| - Cognitive impairment anytime %                                    | 39         | 40        | 48             | 0.687          |
| BDI-II                                                              | 9 ± 10     | 7 ± 6     | 8 ± 7          | 0.542          |
| LEDD                                                                | 370 ± 246  | 355 ± 311 | 416 ± 265      | 0.589          |
| Amyloidβ <sub>1-42</sub> [pg/ml]                                    | 748 ± 213  | 686 ± 175 | 659 ± 277      | 0.463          |
| total-Tau [pg/ml]                                                   | 176 ± 68   | 206 ± 105 | 245 ± 132      | 0.089          |
| phospho181-Tau [pg/ml]                                              | 32 ± 9     | 39 ± 15   | 42 ± 15        | 0.068          |
| AD Profile %                                                        | 0          | 0         | 1.8            | 0.671          |
| Neurofilament light chain [pg/ml]                                   | 854 ± 1132 | 805 ± 483 | 899 ± 421      | 0.775          |
| total α-synuclein [pg/ml]                                           | 527 ± 253  | 527 ± 214 | 598 ± 290      | 0.409          |
| LAG, h                                                              | 22 ± 3     | 22 ± 3    | 21 ± 3 * §     | 0.034          |
| Imax                                                                | 61 ± 14    | 65 ± 14   | 71 ± 13 ** §   | 0.019          |
| AUC                                                                 | 605 ± 207  | 658 ± 217 | 770 ± 231 ** § | 0.014          |

| Number of positive seeding replicates out of 4 (PD-GBA) | 2         | 3         | 4           | p-value |
|---------------------------------------------------------|-----------|-----------|-------------|---------|
| Male sex %                                              | 0         | 68        | 66          | 0.059   |
| Age, years                                              | 57 ± 14   | 61 ± 10   | 64 ± 9      | 0.264   |
| Age at onset, years                                     | 53 ± 16   | 54 ± 11   | 55 ± 9      | 0.846   |
| Disease duration, years                                 | 3 ± 3     | 7 ± 4     | 9 ± 6       | 0.185   |
| H&Y                                                     | 2.0 ± 0.0 | 2.1 ± 0.4 | 2.3 ± 0.8   | 0.566   |
| H&Y ≥2.5 %                                              | 0         | 16        | 29          | 0.293   |
| UPDRS-III                                               | 20 ± 6    | 29 ± 9    | 28 ± 12     | 0.427   |
| Montreal Cognitive Assessment                           | 23 ± 10   | 27 ± 3    | 23 ± 5 §§   | 0.016   |
| Cognitive impairment                                    |           |           |             |         |
| - At baseline %                                         | 33        | 16        | 48          | 0.045   |
| - New during study %                                    | 0         | 31        | 30          | 0.647   |
| - Cognitive impairment anytime %                        | 33        | 42        | 64          | 0.175   |
| BDI-II                                                  | 7 ± 8     | 9 ± 5     | 10 ± 7      | 0.511   |
| LEDD                                                    | 437 ± 28  | 555 ± 330 | 662 ± 442   | 0.440   |
| Amyloid $\beta_{1-42}$ [pg/ml]                          | 783 ± 95  | 727 ± 232 | 729 ± 283   | 0.943   |
| total-Tau [pg/ml]                                       | 216 ± 91  | 225 ± 113 | 251 ± 140   | 0.717   |
| phospho181-Tau [pg/ml]                                  | 39 ± 15   | 35 ± 10   | 40 ± 14     | 0.436   |
| AD Profile %                                            | 0         | 0         | 0           | n.a.    |
| Neurofilament light chain [pg/ml]                       | 838 ± 576 | 699 ± 262 | 1078 ± 1261 | 0.417   |
| total $\alpha$ -synuclein [pg/ml]                       | 498 ± 162 | 529 ± 296 | 545 ± 222   | 0.923   |
| LAG, h                                                  | 23 ± 1    | 21 ± 3    | 19 ± 3 * §  | 0.007   |
| lmax                                                    | 61 ± 8    | 70 ± 13   | 72 ± 13     | 0.245   |
| AUC                                                     | 569 ± 60  | 733 ± 262 | 837 ± 214 * | 0.040   |

BDI-II = Becks depression Inventory version II; H&Y = Hoehn and Yahr; LEDD = Levodopa Equivalent

Daily Dose; UPDRS-III = Unified Parkinson Disease rating Scale part III.

Data are presented as mean and standard deviation.

Post-hoc Bonferroni subgroup comparison for continuous data 2 vs. 4 levels of significance: \* p<0.05;

\*\*p<0.01; \*\*\*p≤0.001.

Post-hoc Bonferroni subgroup comparison for continuous data 3 vs. 4 levels of significance: § p<0.05;

§§ p<0.01; §§§ p≤0.001.

**Supplementary Tables 2: Demographic, clinical and CSF characteristics stratified by LAG Tertile groups for PD-wildtype and PD-GBA separately**

| <b>LAG</b>                        | <b>Highest Tertile (longest LAG)</b> | <b>Mid Tertile</b> | <b>Lowest tertile (shortest LAG)</b> | <b>p-value</b> |
|-----------------------------------|--------------------------------------|--------------------|--------------------------------------|----------------|
| <b>PD-Wildtype</b>                |                                      |                    |                                      |                |
| Male sex %                        | 73                                   | 68                 | 79                                   | 0.608          |
| Age, years                        | 64 ± 8                               | 65 ± 10            | 66 ± 7                               | 0.687          |
| Age at onset, years               | 60 ± 8                               | 60 ± 9             | 61 ± 7                               | 0.883          |
| Disease duration, years           | 5 ± 3                                | 5 ± 3              | 5 ± 3                                | 0.457          |
| H&Y                               | 1.9 ± 0.5                            | 1.9 ± 0.4          | 2.0 ± 0.7                            | 0.460          |
| H&Y ≥2.5 %                        | 7                                    | 8                  | 8                                    | 0.986          |
| UPDRS-III                         | 24 ± 9                               | 22 ± 10            | 25 ± 11                              | 0.602          |
| Montreal Cognitive Assessment     | 26 ± 3                               | 26 ± 4             | 25 ± 4                               | 0.641          |
| Cognitive impairment              |                                      |                    |                                      |                |
| - At baseline %                   | 28                                   | 28                 | 30                                   | 0.966          |
| - New during study %              | 17                                   | 19                 | 38                                   | 0.262          |
| - Cognitive impairment anytime %  | 40                                   | 42                 | 57                                   | 0.408          |
| BDI-II                            | 8 ± 7                                | 8 ± 9              | 7 ± 5                                | 0.813          |
| LEDD                              | 456 ± 303                            | 347 ± 261          | 351 ± 242                            | 0.164          |
| Amyloidβ <sub>1-42</sub> [pg/ml]  | 680 ± 205                            | 687 ± 254          | 668 ± 287                            | 0.956          |
| total-Tau [pg/ml]                 | 232 ± 158                            | 220 ± 91           | 215 ± 74                             | 0.828          |
| phospho181-Tau [pg/ml]            | 40 ± 18                              | 38 ± 13            | 39 ± 10                              | 0.807          |
| AD Profile %                      | 2.4                                  | 0                  | 0                                    | 0.472          |
| Neurofilament light chain [pg/ml] | 813 ± 705                            | 949 ± 571          | 810 ± 283                            | 0.531          |
| total α-synuclein [pg/ml]         | 581 ± 264                            | 598 ± 309          | 491 ± 158                            | 0.280          |

| <b>LAG</b>                        | <b>Highest Tertile (longest LAG)</b> | <b>Mid Tertile</b> | <b>Lowest tertile (shortest LAG)</b> | <b>p-value</b> |
|-----------------------------------|--------------------------------------|--------------------|--------------------------------------|----------------|
| <b>PD-GBA</b>                     |                                      |                    |                                      |                |
| Male sex %                        | 74                                   | 48                 | 70                                   | 0.102          |
| Age, years                        | 65 ± 11                              | 64 ± 10            | 61 ± 8                               | 0.227          |
| Age at onset, years               | 58 ± 12                              | 55 ± 9             | 53 ± 8                               | 0.257          |
| Disease duration, years           | 8 ± 5                                | 9 ± 7              | 8 ± 5                                | 0.400          |
| H&Y                               | 2.2 ± 0.8                            | 2.4 ± 0.8          | 2.1 ± 0.6                            | 0.201          |
| H&Y ≥2.5 %                        | 22                                   | 33                 | 22                                   | 0.511          |
| UPDRS-III                         | 25 ± 11                              | 28 ± 11            | 29 ± 12                              | 0.472          |
| Montreal Cognitive Assessment     | 25 ± 5                               | 23 ± 6             | 25 ± 4                               | 0.502          |
| Cognitive impairment              |                                      |                    |                                      |                |
| - At baseline %                   | 36                                   | 44                 | 39                                   | 0.834          |
| - New during study %              | 14                                   | 40                 | 32                                   | 0.299          |
| - Cognitive impairment anytime %  | 46                                   | 67                 | 58                                   | 0.325          |
| BDI-II                            | 11 ± 6                               | 10 ± 6             | 10 ± 7                               | 0.758          |
| LEDD                              | 593 ± 340                            | 726 ± 497          | 589 ± 392                            | 0.393          |
| Amyloidβ <sub>1-42</sub> [pg/ml]  | 714 ± 231                            | 779 ± 266          | 708 ± 291                            | 0.566          |
| total-Tau [pg/ml]                 | 294 ± 214                            | 258 ± 79           | 204 ± 74 *                           | 0.030          |
| phospho181-Tau [pg/ml]            | 39 ± 11                              | 47 ± 15            | 33 ± 11 <sup>ooo</sup>               | ≤0.001         |
| AD Profile %                      | 0                                    | 0                  | 0                                    | n.a.           |
| Neurofilament light chain [pg/ml] | 1387 ± 1937                          | 869 ± 404          | 813 ± 556                            | 0.122          |
| total α-synuclein [pg/ml]         | 543 ± 191                            | 585 ± 286          | 503 ± 221                            | 0.411          |

BDI-II = Becks depression Inventory version II; H&Y = Hoehn and Yahr; LEDD = Levodopa Equivalent Daily Dose; UPDRS-III = Unified Parkinson Disease rating Scale part III.

Data are presented as mean and standard deviation.

Post-hoc Bonferroni subgroup comparison for continuous data shortest vs. mid Tertile with levels of significance: °  $p < 0.05$ ; °°  $p < 0.01$ ; °°°  $p \leq 0.001$ .

Post-hoc Bonferroni subgroup comparison for continuous data shortest vs. longest Tertile levels of significance: \*  $p < 0.05$ ; \*\* $p < 0.01$ ; \*\*\* $p \leq 0.001$ .

**Supplementary Tables 3: Demographic, clinical and CSF characteristics stratified by I<sub>max</sub> Tertile groups for PD-wildtype and PD-GBA separately**

| <b>I<sub>max</sub></b>            | <b>Lowest Tertile (lowest I<sub>max</sub>)</b> | <b>Mid Tertile</b> | <b>Highest Tertile (highest I<sub>max</sub>)</b> | <b>p-value</b> |
|-----------------------------------|------------------------------------------------|--------------------|--------------------------------------------------|----------------|
| <b>PD-Wildtype</b>                |                                                |                    |                                                  |                |
| Male sex %                        | 69                                             | 82                 | 69                                               | 0.410          |
| Age, years                        | 64 ± 7                                         | 66 ± 10            | 65 ± 9                                           | 0.495          |
| Age at onset, years               | 59 ± 7                                         | 61 ± 9             | 60 ± 9                                           | 0.645          |
| Disease duration, years           | 5 ± 3                                          | 5 ± 3              | 5 ± 3                                            | 0.707          |
| H&Y                               | 1.9 ± 0.4                                      | 1.9 ± 0.4          | 2.0 ± 0.7                                        | 0.533          |
| H&Y ≥2.5 %                        | 7                                              | 7                  | 9                                                | 0.927          |
| UPDRS-III                         | 24 ± 9                                         | 24 ± 10            | 24 ± 11                                          | 0.981          |
| Montreal Cognitive Assessment     | 27 ± 3                                         | 25 ± 5             | 26 ± 3                                           | 0.124          |
| Cognitive impairment              |                                                |                    |                                                  |                |
| - At baseline %                   | 20                                             | 39                 | 30                                               | 0.195          |
| - New during study %              | 15                                             | 24                 | 33                                               | 0.295          |
| - Cognitive impairment anytime %  | 32                                             | 54                 | 53                                               | 0.100          |
| BDI-II                            | 8 ± 7                                          | 8 ± 7              | 8 ± 7                                            | 0.970          |
| LEDD                              | 399 ± 309                                      | 471 ± 287          | 311 ± 198                                        | 0.078          |
| Amyloidβ <sub>1-42</sub> [pg/ml]  | 700 ± 191                                      | 682 ± 266          | 651 ± 280                                        | 0.690          |
| total-Tau [pg/ml]                 | 229 ± 139                                      | 231 ± 126          | 210 ± 81                                         | 0.732          |
| phospho181-Tau [pg/ml]            | 40 ± 15                                        | 40 ± 17            | 38 ± 12                                          | 0.829          |
| AD Profile %                      | 2.4                                            | 0                  | 0                                                | 0.486          |
| Neurofilament light chain [pg/ml] | 843 ± 738                                      | 940 ± 536          | 823 ± 332                                        | 0.724          |
| total α-synuclein [pg/ml]         | 601 ± 295                                      | 573 ± 225          | 515 ± 252                                        | 0.394          |

| <b>I<sub>max</sub></b>            | <b>Lowest Tertile (lowest I<sub>max</sub>)</b> | <b>Mid Tertile</b> | <b>Highest Tertile (highest I<sub>max</sub>)</b> | <b>p-value</b> |
|-----------------------------------|------------------------------------------------|--------------------|--------------------------------------------------|----------------|
| <b>PD-GBA</b>                     |                                                |                    |                                                  |                |
| Male sex %                        | 61                                             | 72                 | 59                                               | 0.533          |
| Age, years                        | 61 ± 10                                        | 63 ± 11            | 65 ± 6                                           | 0.193          |
| Age at onset, years               | 53 ± 10                                        | 55 ± 11            | 57 ± 8                                           | 0.218          |
| Disease duration, years           | 8 ± 6                                          | 8 ± 6              | 8 ± 5                                            | 0.996          |
| H&Y                               | 2.0 ± 0.8                                      | 2.3 ± 0.6          | 2.3 ± 0.8                                        | 0.251          |
| H&Y ≥2.5 %                        | 13                                             | 25                 | 34                                               | 0.199          |
| UPDRS-III                         | 25 ± 10                                        | 28 ± 12            | 30 ± 12                                          | 0.248          |
| Montreal Cognitive Assessment     | 26 ± 3                                         | 23 ± 6             | 24 ± 5                                           | 0.086          |
| Cognitive impairment              |                                                |                    |                                                  |                |
| - At baseline %                   | 19                                             | 56                 | 38                                               | 0.024          |
| - New during study %              | 24                                             | 14                 | 45                                               | 0.124          |
| - Cognitive impairment anytime %  | 38                                             | 63                 | 66                                               | 0.109          |
| BDI-II                            | 10 ± 6                                         | 11 ± 7             | 9 ± 7                                            | 0.357          |
| LEDD                              | 636 ± 525                                      | 664 ± 374          | 591 ± 364                                        | 0.785          |
| Amyloidβ <sub>1-42</sub> [pg/ml]  | 814 ± 275                                      | 702 ± 267          | 697 ± 256                                        | 0.213          |
| total-Tau [pg/ml]                 | 274 ± 188                                      | 248 ± 129          | 218 ± 73                                         | 0.301          |
| phospho181-Tau [pg/ml]            | 40 ± 11                                        | 41 ± 17            | 36 ± 12                                          | 0.402          |
| AD Profile %                      | 0                                              | 0                  | 0                                                | n.a.           |
| Neurofilament light chain [pg/ml] | 1164 ± 1957                                    | 936 ± 503          | 900 ± 571                                        | 0.662          |
| total α-synuclein [pg/ml]         | 575 ± 203                                      | 560 ± 261          | 497 ± 235                                        | 0.423          |

BDI-II = Becks depression Inventory version II; H&Y = Hoehn and Yahr; LEDD = Levodopa Equivalent

Daily Dose; UPDRS-III = Unified Parkinson Disease rating Scale part III.

Data are presented as mean and standard deviation.

**Supplementary Tables 4: Demographic, clinical and CSF characteristics stratified by AUC Tertile groups for PD-wildtype and PD-GBA separately**

| Area under the curve (AUC)        | Lowest Tertile (lowest AUC) | Mid Tertile | Highest Tertile (highest AUC) | p-value |
|-----------------------------------|-----------------------------|-------------|-------------------------------|---------|
| <b>PD-Wildtype</b>                |                             |             |                               |         |
| Male sex %                        | 71                          | 72          | 76                            | 0.889   |
| Age, years                        | 64 ± 8                      | 65 ± 10     | 66 ± 8                        | 0.835   |
| Age at onset, years               | 60 ± 8                      | 60 ± 9      | 61 ± 8                        | 0.842   |
| Disease duration, years           | 5 ± 3                       | 5 ± 3       | 5 ± 3                         | 0.946   |
| H&Y                               | 1.9 ± 0.4                   | 2.0 ± 0.4   | 2.0 ± 0.7                     | 0.473   |
| H&Y ≥2.5 %                        | 5                           | 13          | 7                             | 0.474   |
| UPDRS-III                         | 24 ± 9                      | 23 ± 10     | 25 ± 11                       | 0.762   |
| Montreal Cognitive Assessment     | 27 ± 3                      | 25 ± 4      | 26 ± 3                        | 0.214   |
| Cognitive impairment              |                             |             |                               |         |
| - At baseline %                   | 20                          | 47          | 19                            | 0.018   |
| - New during study %              | 19                          | 18          | 32                            | 0.454   |
| - Cognitive impairment anytime %  | 35                          | 56          | 44                            | 0.197   |
| BDI-II                            | 9 ± 7                       | 7 ± 8       | 7 ± 6                         | 0.385   |
| LEDD                              | 432 ± 317                   | 390 ± 250   | 335 ± 242                     | 0.355   |
| Amyloidβ <sub>1-42</sub> [pg/ml]  | 696 ± 192                   | 652 ± 255   | 686 ± 291                     | 0.733   |
| total-Tau [pg/ml]                 | 237 ± 141                   | 214 ± 122   | 216 ± 75                      | 0.665   |
| phospho181-Tau [pg/ml]            | 42 ± 16                     | 37 ± 16     | 39 ± 10                       | 0.368   |
| AD Profile %                      | 2.4                         | 0           | 0                             | 0.472   |
| Neurofilament light chain [pg/ml] | 803 ± 690                   | 995 ± 612   | 796 ± 292                     | 0.302   |
| total α-synuclein [pg/ml]         | 618 ± 286                   | 559 ± 297   | 502 ± 166                     | 0.203   |

| Area under the curve (AUC)        | Lowest Tertile (lowest AUC) | Mid Tertile | Highest Tertile (highest AUC) | p-value |
|-----------------------------------|-----------------------------|-------------|-------------------------------|---------|
| <b>PD-GBA</b>                     |                             |             |                               |         |
| Male sex %                        | 71                          | 58          | 66                            | 0.600   |
| Age, years                        | 63 ± 10                     | 64 ± 10     | 63 ± 9                        | 0.958   |
| Age at onset, years               | 56 ± 11                     | 54 ± 10     | 55 ± 9                        | 0.853   |
| Disease duration, years           | 7 ± 4                       | 9 ± 7       | 8 ± 5                         | 0.349   |
| H&Y                               | 2.1 ± 0.8                   | 2.3 ± 0.6   | 2.2 ± 0.7                     | 0.626   |
| H&Y ≥2.5 %                        | 19                          | 26          | 29                            | 0.727   |
| UPDRS-III                         | 25 ± 11                     | 28 ± 11     | 29 ± 12                       | 0.409   |
| Montreal Cognitive Assessment     | 25 ± 5                      | 23 ± 5      | 25 ± 5                        | 0.287   |
| Cognitive impairment              |                             |             |                               |         |
| - At baseline %                   | 30                          | 50          | 37                            | 0.332   |
| - New during study %              | 14                          | 40          | 32                            | 0.299   |
| - Cognitive impairment anytime %  | 40                          | 70          | 57                            | 0.109   |
| BDI-II                            | 11 ± 7                      | 10 ± 5      | 10 ± 7                        | 0.753   |
| LEDD                              | 615 ± 346                   | 640 ± 468   | 632 ± 413                     | 0.977   |
| Amyloidβ <sub>1-42</sub> [pg/ml]  | 739 ± 226                   | 773 ± 279   | 690 ± 281                     | 0.461   |
| total-Tau [pg/ml]                 | 267 ± 199                   | 269 ± 121   | 209 ± 77                      | 0.130   |
| phospho181-Tau [pg/ml]            | 40 ± 10                     | 44 ± 16     | 34 ± 12 §                     | 0.015   |
| AD Profile %                      | 0                           | 0           | 0                             | n.a.    |
| Neurofilament light chain [pg/ml] | 1403 ± 2032                 | 848 ± 409   | 847 ± 557                     | 0.135   |
| total α-synuclein [pg/ml]         | 550 ± 176                   | 571 ± 273   | 507 ± 181                     | 0.557   |

BDI-II = Becks depression Inventory version II; H&Y = Hoehn and Yahr; LEDD = Levodopa Equivalent Daily Dose; UPDRS-III = Unified Parkinson Disease rating Scale part III.

Data are presented as mean and standard deviation.

Post-hoc Bonferroni subgroup comparison for continuous data highest vs. mid Tertile level of significance: §  $p < 0.05$ ; §§  $p < 0.01$ ; §§§  $p \leq 0.001$ .



**Supplementary Table 5: Overview of Genetic Variants and CSF  $\alpha$ -Syn seeding results of the genetic cases**

| <b>GBA</b><br>n=93                                                                 | <b>LRKK2</b><br>n=8              | <b>PRKN</b><br>n=14                                                 | <b>PINK1</b><br>n=2                           | <b>Mutations in &gt; 1 genes</b><br>n=4                                               |
|------------------------------------------------------------------------------------|----------------------------------|---------------------------------------------------------------------|-----------------------------------------------|---------------------------------------------------------------------------------------|
| L444P (GBA <sub>severe</sub> )<br>(n=14, seeding pos n=14)                         | G2019S<br>(n=4, seeding pos n=4) | P437L<br>heterozygous<br>(n=3, seeding pos n=0)                     | Q126P<br>homozygous<br>(n=2, seeding pos n=0) | I2020T (LRRK2) + Y304C<br>(GBA <sub>severe</sub> )<br>(n=1, seeding pos n=0)          |
| c.115+1G>A (GBA <sub>severe</sub> )<br>(n=3, seeding pos n=3)                      | R1441C<br>(n=2, seeding pos n=2) | R275W<br>heterozygous<br>(n=3, seeding pos n=3)                     |                                               | ex3+4del (PRKN) + T369M<br>(GBA <sub>risk</sub> )<br>(n=1, seeding pos n=1)           |
| W184R (GBA <sub>severe</sub> )<br>(n=2, seeding pos n=2)                           | N1437S<br>(n=1, seeding pos n=1) | R234Q<br>heterozygous<br>(n=1, seeding pos n=1)                     |                                               | ex4del; ex8+9del (PRKN)<br>+ H255Q (GBA <sub>severe</sub> )<br>(n=1, seeding pos n=0) |
| L444P, T369M (GBA <sub>severe</sub> )<br>(n=1, seeding pos n=1)                    | I2020T<br>(n=1, seeding pos n=0) | ex2del<br>heterozygous<br>(n=1, seeding pos n=1)                    |                                               | R275W (PRKN) + S271G<br>(GBA <sub>mild</sub> )<br>(n=1, seeding pos n=1)              |
| L444P, E388K (GBA <sub>severe</sub> )<br>(n=1, seeding pos n=1)                    |                                  | ex2dup<br>heterozygous<br>(n=1, seeding pos n=1)                    |                                               |                                                                                       |
| L444P, E326K, N392S<br>(GBA <sub>severe</sub> )<br>(n=1, seeding pos n=1)          |                                  | ex3+4del<br>heterozygous<br>(n=1, seeding pos n=1)                  |                                               |                                                                                       |
| L444P, E326K (GBA <sub>severe</sub> )<br>(n=1, seeding pos n=1)                    |                                  | ex8+9del<br>heterozygous<br>(n=1, seeding pos n=1)                  |                                               |                                                                                       |
| c.1265_1319del, D409H,<br>L444P (GBA <sub>severe</sub> )<br>(n=1, seeding pos n=1) |                                  | c.101_102delAG;<br>ex3+4del<br>bi-allelic<br>(n=1, seeding pos n=0) |                                               |                                                                                       |
| D409H (GBA <sub>severe</sub> )<br>(n=1, seeding pos n=1)                           |                                  | ex2del; ex7dup<br>bi-allelic<br>(n=1, seeding pos n=0)              |                                               |                                                                                       |
| G202R (GBA <sub>severe</sub> )<br>(n=1, seeding pos n=1)                           |                                  | ex3+4+5+6del<br>homozygous<br>(n=1, seeding pos n=0)                |                                               |                                                                                       |
| R359X (GBA <sub>severe</sub> )<br>(n=1, seeding pos n=1)                           |                                  |                                                                     |                                               |                                                                                       |
| N370S (GBA <sub>mild</sub> )<br>(n=14, seeding pos n=9)                            |                                  |                                                                     |                                               |                                                                                       |
| D140H, E326K (GBA <sub>mild</sub> )<br>(n=2, seeding pos n=2)                      |                                  |                                                                     |                                               |                                                                                       |
| S271G (GBA <sub>mild</sub> )<br>(n=1, seeding pos n=1)                             |                                  |                                                                     |                                               |                                                                                       |
| S271G, N370S (GBA <sub>mild</sub> )<br>(n=1, seeding pos n=1)                      |                                  |                                                                     |                                               |                                                                                       |
| E326K (GBA <sub>risk</sub> )<br>(n=33, seeding pos n=30)                           |                                  |                                                                     |                                               |                                                                                       |
| T369M (GBA <sub>risk</sub> )<br>(n=13, seeding pos n=13)                           |                                  |                                                                     |                                               |                                                                                       |
| R39C (GBA <sub>risk</sub> )<br>(n=1, seeding pos n=1)                              |                                  |                                                                     |                                               |                                                                                       |
| T297S (GBA <sub>risk</sub> )<br>(n=1, seeding pos n=0)                             |                                  |                                                                     |                                               |                                                                                       |

n=: total sample size per mutation

seeding pos n=: number of patients with positive CSF  $\alpha$ -Syn seeding out of the total sample size per mutation

**Supplementary Table 6: CSF  $\alpha$ -Syn seeding kinetic raw data for the total cohort and stratified for PD-wildtype and PD-GBA separately**

|          | Total cohort | PD wildtype | PD GBA  |
|----------|--------------|-------------|---------|
| LAG raw  | 19.9         | 20.5        | 19.2    |
| Imax raw | 121303       | 121513      | 121162  |
| AUC raw  | 1301025      | 1265601     | 1342378 |

**Supplementary Figure 1: Representation of raw fluorescence kinetic signals of  $\alpha$ -Syn SAA.**

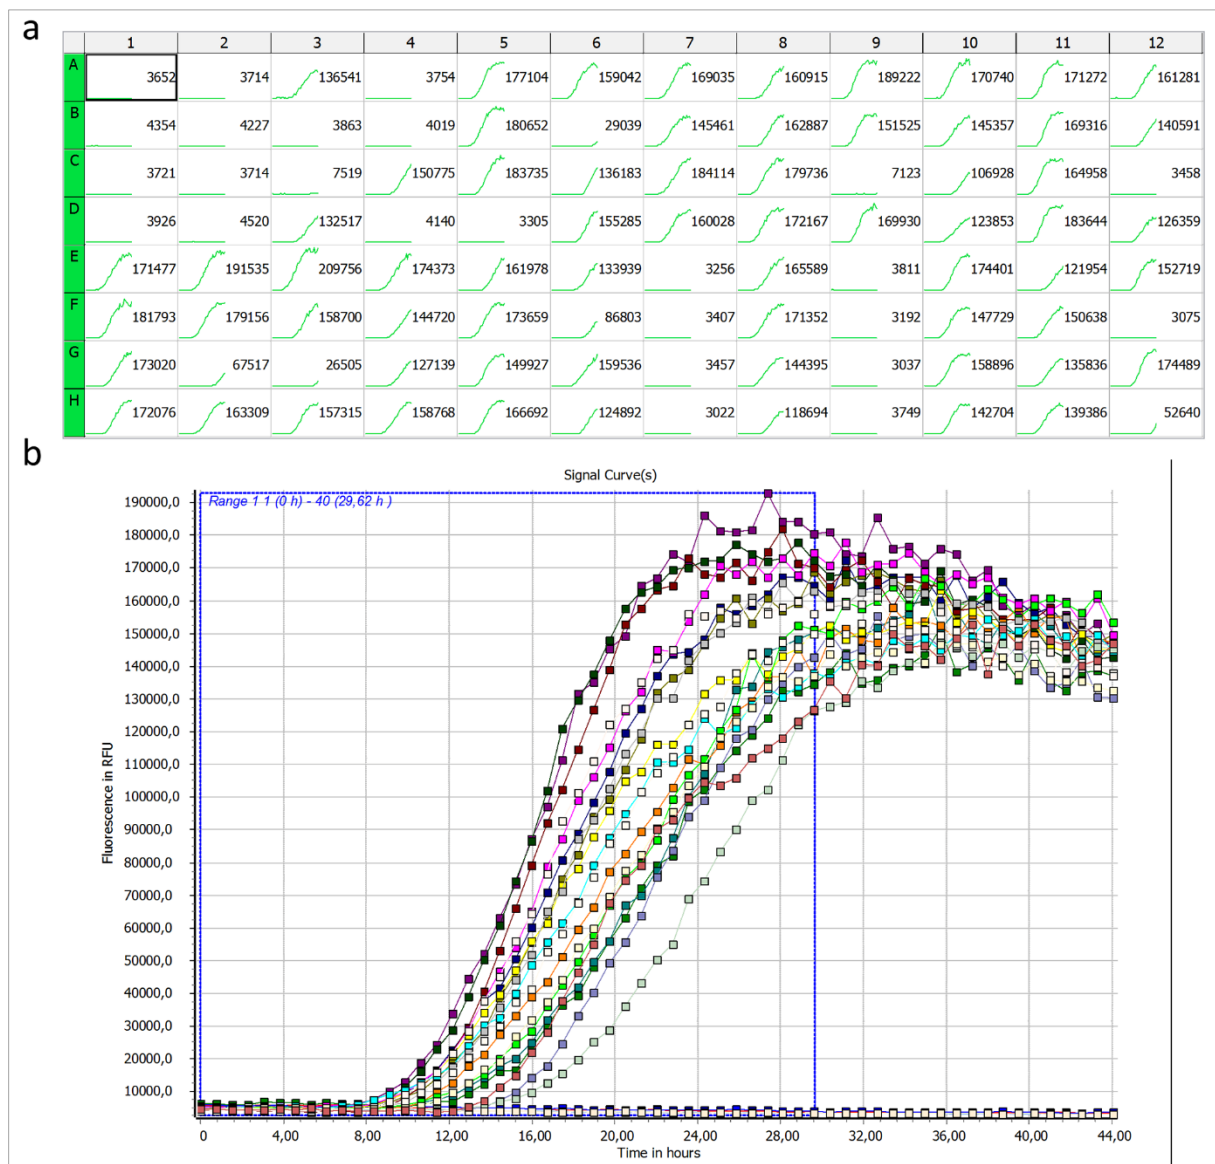

(a) Representative results of a 96-well plate run including one negative (lane 1, top) and positive (lane 1, bottom) control samples and 20 patients (lanes 2-11). (b) Kinetic curves are shown as the average of the positive replicates of each sample. The “unclear” sample (1 out of 4 positive replicates) in lane 4 was excluded.
